# Supplementary material
Source: PubMed Central journal article supplement (PMC2662290)
Supplement: M803158200_1.pdf [file M803158200_1.pdf]

Supplemental table S1 **Nucleotide specificity of Hda-cHis Fr III**

| Competitor | Bound ADP<br>(% of control) | Competitor | Bound ADP<br>(% of control) |
|------------|-----------------------------|------------|-----------------------------|
| None       | [100]                       | AMP        | 97                          |
| ADP        | 1.0                         | dATP       | 95                          |
| ATP        | 37                          | dGTP       | 105                         |
| GTP        | 107                         | dCTP       | 97                          |
| CTP        | 93                          | dTTP       | 90                          |
| UTP        | 94                          | ppGpp      | 106                         |
| GDP        | 107                         | cAMP       | 105                         |
| CDP        | 93                          |            |                             |
| UDP        | 94                          |            |                             |

Nucleotide competition with ADP was measured using Hda-cHis Fr III as described for Table 1. The error range with each experiment was 0.5-6.5%.

## Supplemental Figure S1

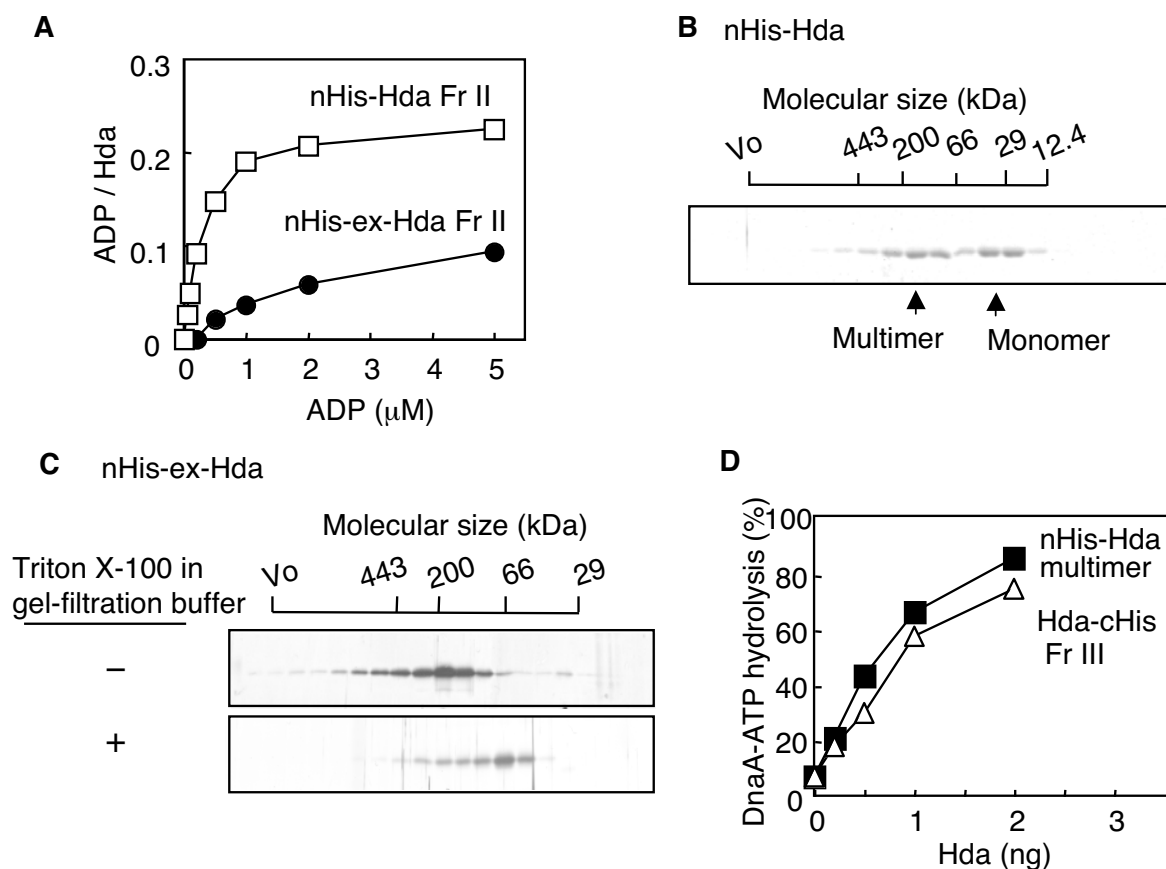

### SUPPLEMENTAL FIGURE S1 Inhibitory effect of the N-terminal extra region of nHis-ex-Hda on ADP binding

*A*, ADP binding activities of nHis-Hda and nHis-ex-Hda. nHis-Hda Fr II and nHis-ex-Hda Fr II (5 pmol) were incubated at 30 °C for 20 min in buffer (10  $\mu\text{l}$ ) containing the indicated concentration of [ $^3\text{H}$ ]ADP, followed by filter-retention as described for Fig. 3*A*. Bound ADP molecules per Hda monomer are presented. See *Experimental procedures* for purification of nHis-Hda Fr II. *B*, nHis-Hda Fr II (28  $\mu\text{g}$ ) was subjected to Superose-12 PC 3.2/30 gel filtration at a flow rate of 40  $\mu\text{l}/\text{min}$ . Eluted proteins were collected in 60  $\mu\text{l}$  fractions and portions (5  $\mu\text{l}$ ) were analyzed by SDS-PAGE and Coomassie Brilliant Blue staining. The position of molecular size markers were determined under the same conditions and are indicated. Peak fractions of multimers (*Multimer*) and monomers (*Monomer*) are also indicated. *C*, nHis-ex-Hda Fr II (3.2  $\mu\text{g}$ ) was subjected to a Superdex-200 PC 3.2/30 gel filtration column equilibrated with buffer containing (+) or excluding (–) 0.1% Triton X-100 at a flow rate of 5  $\mu\text{l}/\text{min}$ . Eluted proteins were collected in 30  $\mu\text{l}$  fractions and portions (5  $\mu\text{l}$ ) were analyzed by SDS-PAGE and silver staining. *D*, DnaA-ATP hydrolysis activities of nHis-Hda multimers purified in *panel B* and Hda-cHis Fr III were assessed in a staged RIDA reconstituted system. The indicated amounts of Hda were incubated at 30 °C for 20 min in the presence of the DNA-loaded clamp (100 fmol as clamp), 0.5 pmol [ $^{32}\text{P}$ ]ATP-DnaA and 30  $\mu\text{M}$  ADP.

## Supplemental Figure S2

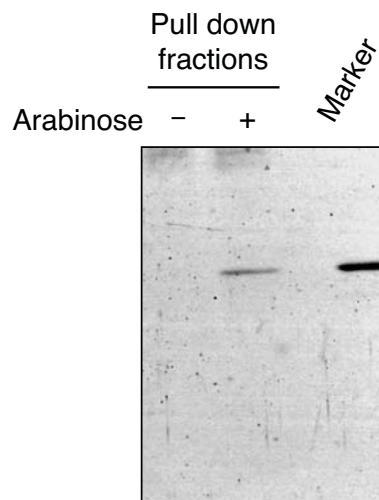

### SUPPLEMENTAL FIGURE S2 **Specific recovery of nHis-Hda from MC1061 harboring pBAD/nHis-Hda**

Pull down experiments were performed as described for Figure 5. Briefly, MC1061 cells harboring pBAD/nHis-Hda were grown at 37 °C in modified TG medium containing 100 µg/mL ampicillin. When  $A_{600}$  of the culture reached 0.1, 0.5 % arabinose was added and incubation continued for 10 min. Cells in culture (10 mL) were collected, washed, and lysed as described in *Experimental Procedures*. Pull down experiments were performed and recovered proteins were analyzed by SDS-PAGE and Coomassie Brilliant Blue staining. *Marker* indicates purified nHis-Hda protein.

### Supplemental Figure S3

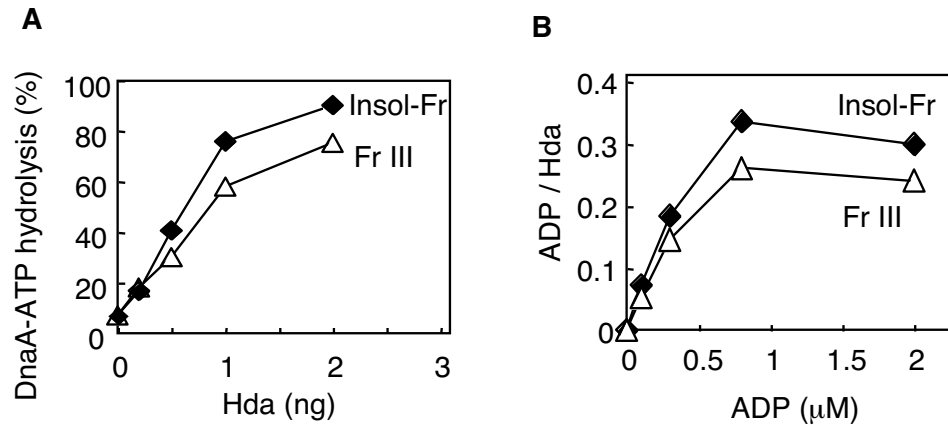

#### SUPPLEMENTAL FIGURE S3 Activity of Hda-cHis purified from an insoluble fraction of cell lysate for ADP binding and DnaA-ATP hydrolysis

Hda-cHis was purified from an insoluble fraction of cell lysate (*Insol-Fr*), as described in the *Experimental procedures*. *A*, DnaA-ATP hydrolysis activity. This experiment was simultaneously performed with that of supplemental Fig. S1D and; thus, for Hda-cHis Fr III (*Fr III*), the identical data is shown. *B*, ADP binding activity. Hda proteins (1 pmol each) were incubated at 30 °C for 20 min in buffer (12.5  $\mu$ l) containing the indicated concentrations of [ $^3$ H]ADP, followed by the filter-retention as described for Fig. 3A. Bound ADP molecules per Hda monomer are presented.
